# Supplementary material for: Investigating the performance of a greenhouse gas observatory in Hefei, China
Source: Copernicus journal article supplement (doi:10.5194/amt-10-2627-2017), 2017-07-25
Supplement: Supplementary file [file amt-10-2627-2017-supplement-title-page.pdf › amt-10-2627-2017-supplement-title-page.pdf]

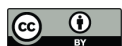

## *Supplement of*

# **Investigating the performance of a greenhouse gas observatory in Hefei, China**

**Wei Wang et al.**

*Correspondence to:* Cheng Liu (chliu81@ustc.edu.cn) and Youwen Sun (ywsun@aiofm.ac.cn)

- amt-10-2627-2017-supplement-title-page.pdf
- Supplement\_files
  - Dataset
    - \* oof\_result\_fts\_201407\_201501.txt
    - \* oof\_result\_fts\_201504\_201604.txt
    - \* time\_series\_em27\_201609\_201612.dat
    - \* time\_series\_em27\_2017\_01\_02.dat
  - Supplement.pdf

The copyright of individual parts of the supplement might differ from the CC BY 3.0 License.
